# Supplementary material for: GMP-compliant iPS cell lines show widespread plasticity in a new set of differentiation workflows for cell replacement and cancer immunotherapy
Source: PubMed Central journal article supplement (PMC11386223; doi:10.1093/stcltm/szae047), 2024-07-23
Supplement: szae047_suppl_supplementary_table_s1.pdf [file szae047_suppl_supplementary_table_s1.pdf]

## Specific safety testing specifications concerning starting material

### Testing of mother

|                | <b>Specification</b> | <b>Remarks</b>              |
|----------------|----------------------|-----------------------------|
| α-HBc-Ab       | Negative             |                             |
| α-HCV-Ab       | Negative             |                             |
| HEV-NAT        | Negative             | For donations after 01/2020 |
| α-HIV I/II-Ab  | Negative             |                             |
| α-HTLV I/II-Ab | Negative             |                             |
| HBsAG          | Negative             |                             |
| TPPA           | Negative             |                             |
| HBV-PCR        | Negative             | Alternatively on cord blood |
| HCV-PCR        | Negative             | Alternatively on cord blood |
| HIV-PCR        | Negative             | Alternatively on cord blood |
| α-CMV-IgG      |                      | For information only        |
| α-CMV-IgM      |                      | For information only        |

### Testing of cord blood

|               |          |                         |
|---------------|----------|-------------------------|
| CMV-PCR       | Negative |                         |
| HBV-PCR       | Negative | Alternatively on mother |
| HCV-PCR       | Negative | Alternatively on mother |
| HIV-PCR       | Negative | Alternatively on mother |
| Parvo-B19-PCR | Negative |                         |

## In-process controls (reprogramming / iPSC clone selection)

|                        | <b>Specification</b>                                 | <b>Assay</b>                                     | <b>Category</b>   |
|------------------------|------------------------------------------------------|--------------------------------------------------|-------------------|
| Marker gene expression | <3-fold average deviation from hESC controls         | RT-qPCR on iPSC clone for 6 hPSC markers         | Identity          |
|                        | >10-fold average upregulation against starting cells | RT-qPCR on iPSC clone for 6 hPSC markers         | Identity          |
|                        | >10-fold downregulation against starting cells       | RT-qPCR on iPSC clone for starting cell marker   | Identity          |
|                        | >70% positive for hPSC marker                        | Flow cytometry before cell bank cryopreservation | Identity / purity |
| Reprogramming vectors  | Undetectable in 2 consecutive passages               | 2 TaqMan assays (40 cycles)                      | Safety            |

## QC specifications (batch release criteria) for iPSCs

|                    | <b>Specification</b>               | <b>Assay</b>                                        | <b>Category</b> |
|--------------------|------------------------------------|-----------------------------------------------------|-----------------|
| Sterility          | Negative                           | Acc. Ph.Eur. 2.6.27 (BD BACTEX FX)                  | Safety          |
| Mycoplasma         | Negative                           | Acc. Ph.Eur. 2.6.7 (culture method)                 | Safety          |
|                    | Negative                           | Acc. Ph.Eur. 2.6.7 (indicator cell method)          | Safety          |
| Endotoxin          | <1.0 EU/ml                         | Acc. Ph.Eur. 2.6.14 (method D)                      | Safety          |
| Viral contaminants | Negative                           | Transmission electron microscopy (TEM assay)        | Safety          |
|                    | Negative                           | Product-Enhanced Reverse-Transkriptase-Assay (PERT) | Safety          |
|                    | No indication of viral replication | Deep RNA-sequencing for active viruses              | Safety          |

|                        |                                                              |                                               |                    |
|------------------------|--------------------------------------------------------------|-----------------------------------------------|--------------------|
| Morphology             | Epithelial epiblast-like, colony-forming                     | Phase contrast microscopy                     | Identity           |
| Marker gene expression | >70% positive for 2 hPSC markers                             | Flow cytometry                                | Identity / purity  |
|                        | Staining overall specific and positive for 5 hPSC markers    | Immunocytochemistry                           | Identity           |
|                        | <3-fold average deviation from hESC controls                 | RT-qPCR for 6 hPSC markers                    | Identity           |
| Genetic identity       | Identical profiles                                           | STR analysis of iPSCs and parental CB cells   | Identity           |
| Genomic integrity      | 46,XX or 46,XY genotype, no aneuploidies                     | Cytogenetic analysis (G banding)              | Integrity          |
|                        | No gain of functional mutations in defined cancer gene panel | Whole-genome sequencing (iPSCs against CB)    | Integrity / safety |
|                        | No gain of numerical aberrations >5 Mbp                      | Whole-genome sequencing (iPSCs against CB)    | Integrity          |
| iPSC recovery          | >100,000 attached live cells 24h post thaw                   | Cell counting / Trypan Blue exclusion         | Integrity          |
| Reprogramming vectors  | Undetectable                                                 | 2 TaqMan assays (40 cycles)                   | Impurity / safety  |
| Pluripotency           | Staining specific and positive for 1 marker per germ layer   | Immunocytochemistry on differentiated samples | Potency            |
|                        | >5-fold upregulation vs. iPSCs for 6 marker genes            | RT-qPCR on 2 marker genes per germ layer      | Potency            |

### Optional accessory testing for viral contaminants on selected EU iPSC lines according to 21 CFR 1271 requirements

|                      | <b>Specification</b> | <b>Assay</b>                                        |
|----------------------|----------------------|-----------------------------------------------------|
| In vivo testing      | Negative             | In vivo detection of adventitious viruses (ICH/EU)  |
| In vitro testing     | Negative             | In vitro detection of adventitious viruses (ICH/EU) |
| CMV                  | Negative             | PCR                                                 |
| HIV 1&2              | Negative             | PCR                                                 |
| HTLV 1&2             | Negative             | PCR                                                 |
| HHV-6                | Negative             | PCR                                                 |
| HHV-7                | Negative             | PCR                                                 |
| HHV-8                | Negative             | PCR                                                 |
| JC Virus             | Negative             | PCR                                                 |
| BK Virus             | Negative             | PCR                                                 |
| EBV                  | Negative             | PCR                                                 |
| EV (Enterovirus)     | Negative             | PCR                                                 |
| Human Parvovirus B19 | Negative             | PCR                                                 |
| HAV                  | Negative             | PCR                                                 |
| HBV                  | Negative             | PCR                                                 |
| HPV-16               | Negative             | PCR                                                 |
| HPV-18               | Negative             | PCR                                                 |
| HCV                  | Negative             | PCR                                                 |
| WNV                  | Negative             | PCR                                                 |
| ZIKV                 | Negative             | PCR                                                 |

### Legend

|          | <b>Definition</b>     |
|----------|-----------------------|
| Ab       | Detectable antibodies |
| BK       | BK-Polyomavirus       |
| CB       | Cord blood            |
| CMV      | Cytomegalovirus       |
| EBV      | Epstein-Barr virus    |
| HB/HC/HE | Hepatitis B/C/E virus |

|       |                                      |
|-------|--------------------------------------|
| HBc   | Hepatitis B core                     |
| HBsAG | Hepatitis B surface antigen          |
| HIV   | Human immunodeficiency viruses       |
| HPV   | Human Papillomavirus                 |
| HTLV  | Human T-cell leukemia-lymphoma virus |
| JC    | Human Polyomavirus 2                 |
| NAT   | Nucleic acid test                    |
| STR   | Short tandem repeat                  |
| TPPA  | Treponema palladium                  |
| WNV   | West Nile virus                      |
| ZIKV  | Zika virus                           |
