# Supplementary material for: GMP-compliant iPS cell lines show widespread plasticity in a new set of differentiation workflows for cell replacement and cancer immunotherapy
Source: PubMed Central journal article supplement (PMC11386223; doi:10.1093/stcltm/szae047), 2024-07-23
Supplement: szae047_suppl_supplementary_table_s2.pdf [file szae047_suppl_supplementary_table_s2.pdf]

| Gene ID         | Chr | WikiGene description                                             | iPSCs # reads per mio | RPE # reads per mio | MSCs # reads per mio | CMS # reads per mio | HE # reads per mio | NK # reads per mio | Gene symbol | Ratio RPE vs others | Ratio MSCs vs others | Ratio CMS vs others | Ratio HE vs others | Ratio NK vs others |
|-----------------|-----|------------------------------------------------------------------|-----------------------|---------------------|----------------------|---------------------|--------------------|--------------------|-------------|---------------------|----------------------|---------------------|--------------------|--------------------|
| ENSG00000118271 | 18  | transthyretin                                                    | 4                     | 6497                | 1                    | 3                   | 1                  | 1                  | TTR         | 3248.5              | 0.0                  | 0.0                 | 0.0                | 0.0                |
| ENSG00000107165 | 9   | tyrosinase related protein 1                                     | 1                     | 2535                | 1                    | 1                   | 1                  | 1                  | TYRP1       | 2535.0              | 0.0                  | 0.0                 | 0.0                | 0.0                |
| ENSG00000080166 | 13  | dopachrome tautomerase                                           | 2                     | 2245                | 1                    | 1                   | 1                  | 1                  | DCT         | 1870.8              | 0.0                  | 0.0                 | 0.0                | 0.0                |
| ENSG00000134160 | 15  | transient receptor potential cation channel subfamily M member 1 | 1                     | 1188                | 1                    | 1                   | 1                  | 1                  | TRPM1       | 1188.0              | 0.0                  | 0.0                 | 0.0                | 0.0                |
| ENSG00000253117 | 8   | otoconin 90                                                      | 1                     | 737                 | 1                    | 1                   | 1                  | 1                  | OC90        | 737.0               | 0.0                  | 0.0                 | 0.0                | 0.0                |
| ENSG00000107317 | 9   | prostaglandin D2 synthase                                        | 2                     | 2186                | 12                   | 1                   | 1                  | 1                  | PTGDS       | 642.9               | 0.0                  | 0.0                 | 0.0                | 0.0                |
| ENSG00000049540 | 7   | elastin                                                          | 7                     | 2869                | 8                    | 1                   | 6                  | 1                  | ELN         | 623.7               | 0.0                  | 0.0                 | 0.0                | 0.0                |
| ENSG00000086696 | 16  | hydroxysteroid 17-beta dehydrogenase 2                           | 1                     | 947                 | 3                    | 1                   | 1                  | 2                  | HSD17B2     | 591.9               | 0.0                  | 0.0                 | 0.0                | 0.0                |
| ENSG00000235448 | 9   | 0                                                                | 1                     | 327                 | 1                    | 1                   | 1                  | 1                  | LURAP1L-AS1 | 327.0               | 0.0                  | 0.0                 | 0.0                | 0.0                |
| ENSG00000164175 | 5   | solute carrier family 45 member 2                                | 1                     | 427                 | 3                    | 1                   | 1                  | 1                  | SLC45A2     | 305.0               | 0.0                  | 0.0                 | 0.0                | 0.0                |
| ENSG00000261235 | 16  | 0                                                                | 3                     | 857                 | 1                    | 1                   | 3                  | 7                  | HSD17B2-AS1 | 285.7               | 0.0                  | 0.0                 | 0.0                | 0.0                |
| ENSG00000232044 | 2   | 0                                                                | 1                     | 273                 | 1                    | 1                   | 1                  | 1                  | SILC1       | 273.0               | 0.0                  | 0.0                 | 0.0                | 0.0                |
| ENSG00000185664 | 12  | premelanosome protein                                            | 111                   | 9513                | 5                    | 24                  | 38                 | 7                  | PMEL        | 257.1               | 0.0                  | 0.0                 | 0.0                | 0.0                |
| ENSG00000077498 | 11  | tyrosinase                                                       | 1                     | 241                 | 1                    | 1                   | 1                  | 1                  | TYR         | 241.0               | 0.0                  | 0.0                 | 0.0                | 0.0                |
| ENSG00000083067 | 9   | transient receptor potential cation channel subfamily M member 3 | 12                    | 717                 | 1                    | 2                   | 1                  | 1                  | TRPM3       | 210.9               | 0.0                  | 0.0                 | 0.0                | 0.0                |
| ENSG00000243566 | 7   | uropodin 3B                                                      | 1                     | 174                 | 1                    | 1                   | 1                  | 1                  | UPK3B       | 174.0               | 0.0                  | 0.0                 | 0.0                | 0.0                |
| ENSG00000069696 | 11  | dopamine receptor D4                                             | 2                     | 313                 | 5                    | 1                   | 1                  | 1                  | DRD4        | 156.5               | 0.1                  | 0.0                 | 0.0                | 0.0                |
| ENSG00000140522 | 15  | retinaldehyde binding protein 1                                  | 1                     | 155                 | 1                    | 1                   | 1                  | 1                  | RLBP1       | 155.0               | 0.0                  | 0.0                 | 0.0                | 0.0                |
| ENSG00000136235 | 7   | glycoprotein nmb                                                 | 2                     | 1165                | 28                   | 1                   | 1                  | 7                  | GNPMB       | 149.4               | 0.1                  | 0.0                 | 0.0                | 0.0                |
| ENSG00000163817 | 3   | solute carrier family 6 member 20                                | 2                     | 171                 | 1                    | 1                   | 1                  | 1                  | SLC6A20     | 142.5               | 0.0                  | 0.0                 | 0.0                | 0.0                |
| ENSG00000007372 | 11  | paired box 6                                                     | 1                     | 138                 | 1                    | 1                   | 1                  | 1                  | PAX6        | 138.0               | 0.0                  | 0.0                 | 0.0                | 0.0                |
| ENSG00000188505 | 19  | NCCRP1, F-box associated domain containing                       | 1                     | 134                 | 1                    | 1                   | 1                  | 1                  | NCCRP1      | 134.0               | 0.0                  | 0.0                 | 0.0                | 0.0                |
| ENSG00000121898 | 10  | carboxypeptidase X, M14 family member 2                          | 8                     | 317                 | 1                    | 1                   | 1                  | 1                  | CPXM2       | 132.1               | 0.0                  | 0.0                 | 0.0                | 0.0                |
| ENSG00000081277 | 1   | plakophilin 1                                                    | 5                     | 232                 | 1                    | 1                   | 1                  | 1                  | PKP1        | 128.9               | 0.0                  | 0.0                 | 0.0                | 0.0                |
| ENSG00000253309 | 13  | serpin family E member 3                                         | 2                     | 228                 | 4                    | 1                   | 1                  | 1                  | SERPINE3    | 126.7               | 0.1                  | 0.0                 | 0.0                | 0.0                |
| ENSG00000198597 | 19  | zinc finger protein 536                                          | 1                     | 122                 | 1                    | 1                   | 1                  | 1                  | ZNF536      | 122.0               | 0.0                  | 0.0                 | 0.0                | 0.0                |
| ENSG00000174808 | 4   | betacellulin                                                     | 1                     | 121                 | 1                    | 1                   | 1                  | 1                  | BTC         | 121.0               | 0.0                  | 0.0                 | 0.0                | 0.0                |
| ENSG00000237988 | 6   | olfactory receptor family 2 subfamily I member 1 pseudogene      | 1                     | 119                 | 1                    | 1                   | 1                  | 1                  | OR21P       | 119.0               | 0.0                  | 0.0                 | 0.0                | 0.0                |
| ENSG00000177459 | 8   | glutamate rich 5                                                 | 1                     | 111                 | 1                    | 1                   | 1                  | 1                  | ERIC5       | 111.0               | 0.0                  | 0.0                 | 0.0                | 0.0                |
| ENSG00000189056 | 7   | reelin                                                           | 1                     | 821                 | 1                    | 33                  | 1                  | 1                  | RELN        | 110.9               | 0.0                  | 0.2                 | 0.0                | 0.0                |
| ENSG00000164112 | 4   | small integral membrane protein 43                               | 2                     | 121                 | 1                    | 1                   | 1                  | 1                  | SMIM43      | 100.8               | 0.0                  | 0.0                 | 0.0                | 0.0                |
| ENSG00000162989 | 2   | potassium inwardly rectifying channel subfamily J member 3       | 1                     | 88                  | 1                    | 1                   | 1                  | 1                  | KCNJ3       | 88.0                | 0.1                  | 0.1                 | 0.1                | 0.1                |
| ENSG00000179292 | 11  | transmembrane protein 151A                                       | 4                     | 138                 | 1                    | 1                   | 1                  | 1                  | TMEM151A    | 86.3                | 0.0                  | 0.0                 | 0.0                | 0.0                |
| ENSG00000171243 | 7   | sclerostin domain containing 1                                   | 1                     | 83                  | 1                    | 1                   | 1                  | 1                  | SOSTDC1     | 83.0                | 0.1                  | 0.1                 | 0.1                | 0.1                |
| ENSG00000182747 | 6   | solute carrier family 35 member D3                               | 1                     | 114                 | 1                    | 1                   | 3                  | 1                  | SLC35D3     | 81.4                | 0.0                  | 0.0                 | 0.1                | 0.0                |
| ENSG00000259583 | 15  | ALDH1A3 antisense RNA 1                                          | 1                     | 85                  | 1                    | 1                   | 1                  | 2                  | ALDH1A3-AS1 | 70.8                | 0.1                  | 0.1                 | 0.1                | 0.1                |
| ENSG00000100156 | 22  | solute carrier family 16 member 8                                | 1                     | 68                  | 1                    | 1                   | 1                  | 1                  | SLC16A8     | 68.0                | 0.1                  | 0.1                 | 0.1                | 0.1                |
| ENSG00000248550 | 14  | 0                                                                | 1                     | 67                  | 1                    | 1                   | 1                  | 1                  | OTX2-AS1    | 67.0                | 0.1                  | 0.1                 | 0.1                | 0.1                |
| ENSG00000120057 | 10  | secreted frizzled related protein 5                              | 1                     | 66                  | 1                    | 1                   | 1                  | 1                  | SFRP5       | 66.0                | 0.1                  | 0.1                 | 0.1                | 0.1                |
| ENSG00000080644 | 15  | cholinergic receptor nicotinic alpha 3 subunit                   | 18                    | 435                 | 1                    | 1                   | 12                 | 1                  | CHRNA3      | 65.9                | 0.0                  | 0.0                 | 0.1                | 0.0                |
| ENSG00000108821 | 17  | collagen type I alpha 1 chain                                    | 287                   | 26                  | 47194                | 78                  | 96                 | 37                 | COL1A1      | 0.0                 | 450.3                | 0.0                 | 0.0                | 0.0                |
| ENSG00000133110 | 13  | periostin                                                        | 1                     | 3                   | 2416                 | 1                   | 21                 | 1                  | POSTN       | 0.0                 | 447.4                | 0.0                 | 0.0                | 0.0                |

|                 |    |                                                           |     |    |       |      |     |    |            |     |       |        |     |     |
|-----------------|----|-----------------------------------------------------------|-----|----|-------|------|-----|----|------------|-----|-------|--------|-----|-----|
| ENSG00000111799 | 6  | collagen type XII alpha 1 chain                           | 13  | 3  | 1792  | 1    | 3   | 1  | COL12A1    | 0.0 | 426.7 | 0.0    | 0.0 | 0.0 |
| ENSG00000166741 | 11 | nicotinamide N-methyltransferase                          | 1   | 1  | 1182  | 1    | 3   | 9  | NNMT       | 0.0 | 394.0 | 0.0    | 0.0 | 0.0 |
| ENSG00000163017 | 2  | actin gamma 2, smooth muscle                              | 14  | 1  | 1799  | 1    | 1   | 6  | ACTG2      | 0.0 | 391.1 | 0.0    | 0.0 | 0.0 |
| ENSG00000188624 | 19 | IGF like family member 3                                  | 1   | 1  | 316   | 1    | 1   | 1  | IGFL3      | 0.0 | 316.0 | 0.0    | 0.0 | 0.0 |
| ENSG00000164692 | 7  | collagen type I alpha 2 chain                             | 132 | 62 | 38467 | 182  | 343 | 31 | COL1A2     | 0.0 | 256.4 | 0.0    | 0.0 | 0.0 |
| ENSG00000078098 | 2  | fibroblast activation protein alpha                       | 1   | 2  | 263   | 1    | 1   | 1  | FAP        | 0.0 | 219.2 | 0.0    | 0.0 | 0.0 |
| ENSG00000041982 | 9  | tenascin C                                                | 11  | 1  | 721   | 4    | 1   | 1  | TNC        | 0.0 | 200.3 | 0.0    | 0.0 | 0.0 |
| ENSG00000198542 | 13 | integrin subunit beta like 1                              | 1   | 1  | 181   | 1    | 1   | 1  | ITGBL1     | 0.0 | 181.0 | 0.0    | 0.0 | 0.0 |
| ENSG00000186340 | 6  | thrombospondin 2                                          | 27  | 2  | 1177  | 1    | 1   | 2  | THBS2      | 0.0 | 178.3 | 0.0    | 0.0 | 0.0 |
| ENSG00000101825 | X  | matrix remodeling associated 5                            | 1   | 4  | 273   | 1    | 1   | 1  | MXRA5      | 0.1 | 170.6 | 0.0    | 0.0 | 0.0 |
| ENSG00000226445 | 6  | 0                                                         | 25  | 4  | 1131  | 1    | 1   | 3  | THBS2-AS1  | 0.0 | 166.3 | 0.0    | 0.0 | 0.0 |
| ENSG00000120708 | 5  | transforming growth factor beta induced                   | 13  | 68 | 3416  | 6    | 12  | 6  | TGFBI      | 0.1 | 162.7 | 0.0    | 0.0 | 0.0 |
| ENSG00000115414 | 2  | fibronectin 1                                             | 25  | 8  | 5198  | 25   | 81  | 21 | FN1        | 0.0 | 162.4 | 0.0    | 0.1 | 0.0 |
| ENSG00000102466 | 13 | fibroblast growth factor 14                               | 1   | 2  | 193   | 1    | 1   | 1  | FGF14      | 0.1 | 160.8 | 0.0    | 0.0 | 0.0 |
| ENSG00000197614 | 12 | microfibril associated protein 5                          | 1   | 1  | 158   | 1    | 1   | 1  | MFAP5      | 0.0 | 158.0 | 0.0    | 0.0 | 0.0 |
| ENSG00000139329 | 12 | lumican                                                   | 1   | 3  | 1559  | 11   | 29  | 7  | LUM        | 0.0 | 152.8 | 0.0    | 0.1 | 0.0 |
| ENSG00000116132 | 1  | paired related homeobox 1                                 | 1   | 13 | 621   | 1    | 6   | 2  | PRRX1      | 0.1 | 135.0 | 0.0    | 0.0 | 0.0 |
| ENSG00000163359 | 2  | collagen type VI alpha 3 chain                            | 2   | 1  | 726   | 2    | 23  | 1  | COL6A3     | 0.0 | 125.2 | 0.0    | 0.2 | 0.0 |
| ENSG00000231290 | 20 | APCDD1L divergent transcript                              | 1   | 1  | 115   | 1    | 1   | 1  | APCDD1L-DT | 0.0 | 115.0 | 0.0    | 0.0 | 0.0 |
| ENSG00000137801 | 15 | thrombospondin 1                                          | 16  | 1  | 591   | 1    | 5   | 3  | THBS1      | 0.0 | 113.7 | 0.0    | 0.0 | 0.0 |
| ENSG00000082497 | 1  | SERTA domain containing 4                                 | 1   | 1  | 113   | 1    | 1   | 1  | SERTAD4    | 0.0 | 113.0 | 0.0    | 0.0 | 0.0 |
| ENSG00000164932 | 8  | collagen triple helix repeat containing 1                 | 9   | 7  | 892   | 17   | 7   | 1  | CTHRC1     | 0.0 | 108.8 | 0.1    | 0.0 | 0.0 |
| ENSG00000082196 | 5  | C1q and TNF related 3                                     | 1   | 5  | 433   | 2    | 8   | 4  | C1QTNF3    | 0.1 | 108.3 | 0.0    | 0.1 | 0.0 |
| ENSG00000183160 | 12 | transmembrane protein 119                                 | 1   | 1  | 263   | 1    | 9   | 1  | TMEM119    | 0.0 | 101.2 | 0.0    | 0.2 | 0.0 |
| ENSG00000168542 | 2  | collagen type III alpha 1 chain                           | 3   | 29 | 8134  | 26   | 338 | 22 | COL3A1     | 0.0 | 97.3  | 0.0    | 0.2 | 0.0 |
| ENSG00000079931 | 6  | monooxygenase DBH like 1                                  | 4   | 1  | 155   | 1    | 1   | 1  | MOXD1      | 0.0 | 96.9  | 0.0    | 0.0 | 0.0 |
| ENSG00000138316 | 10 | ADAM metallopeptidase with thrombospondin type 1 motif 14 | 4   | 1  | 211   | 1    | 2   | 3  | ADAMTS14   | 0.0 | 95.9  | 0.0    | 0.0 | 0.1 |
| ENSG00000130635 | 9  | collagen type V alpha 1 chain                             | 6   | 13 | 1331  | 22   | 29  | 2  | COL5A1     | 0.0 | 92.4  | 0.1    | 0.1 | 0.0 |
| ENSG00000129009 | 15 | immunoglobulin superfamily containing leucine rich repeat | 1   | 7  | 386   | 1    | 11  | 1  | ISLR       | 0.1 | 91.9  | 0.0    | 0.1 | 0.0 |
| ENSG00000128422 | 17 | keratin 17                                                | 1   | 3  | 125   | 1    | 1   | 1  | KRT17      | 0.1 | 89.3  | 0.0    | 0.0 | 0.0 |
| ENSG00000255690 | 7  | TLR4 interactor with leucine rich repeats                 | 1   | 1  | 98    | 1    | 2   | 1  | TRIL       | 0.0 | 81.7  | 0.0    | 0.1 | 0.0 |
| ENSG00000173077 | 9  | 0                                                         | 1   | 1  | 81    | 1    | 1   | 1  | DELEC1     | 0.1 | 81.0  | 0.1    | 0.1 | 0.1 |
| ENSG00000182492 | X  | biglycan                                                  | 4   | 15 | 2744  | 1    | 154 | 4  | BGN        | 0.0 | 77.1  | 0.0    | 0.3 | 0.0 |
| ENSG00000126778 | 14 | SIX homeobox 1                                            | 1   | 1  | 75    | 1    | 1   | 1  | SIX1       | 0.1 | 75.0  | 0.1    | 0.1 | 0.1 |
| ENSG00000011465 | 12 | decorin                                                   | 1   | 4  | 116   | 1    | 1   | 1  | DCN        | 0.2 | 72.5  | 0.0    | 0.0 | 0.0 |
| ENSG00000128710 | 2  | homeobox D10                                              | 1   | 1  | 71    | 1    | 1   | 1  | HOXD10     | 0.1 | 71.0  | 0.1    | 0.1 | 0.1 |
| ENSG00000128713 | 2  | homeobox D11                                              | 1   | 1  | 71    | 1    | 1   | 1  | HOXD11     | 0.1 | 71.0  | 0.1    | 0.1 | 0.1 |
| ENSG00000137809 | 15 | integrin subunit alpha 11                                 | 5   | 2  | 298   | 7    | 3   | 4  | ITGA11     | 0.0 | 71.0  | 0.1    | 0.0 | 0.1 |
| ENSG00000197616 | 14 | myosin heavy chain 6                                      | 1   | 1  | 1     | 7819 | 3   | 1  | MYH6       | 0.0 | 0.0   | 5585.0 | 0.0 | 0.0 |
| ENSG00000106631 | 7  | myosin light chain 7                                      | 8   | 2  | 1     | 6132 | 2   | 1  | MYL7       | 0.0 | 0.0   | 2190.0 | 0.0 | 0.0 |
| ENSG00000198336 | 17 | myosin light chain 4                                      | 1   | 4  | 13    | 4598 | 4   | 1  | MYL4       | 0.0 | 0.0   | 999.6  | 0.0 | 0.0 |
| ENSG00000159173 | 1  | troponin I1, slow skeletal type                           | 2   | 9  | 1     | 2492 | 1   | 1  | TNNI1      | 0.0 | 0.0   | 890.0  | 0.0 | 0.0 |
| ENSG00000092054 | 14 | myosin heavy chain 7                                      | 1   | 1  | 1     | 741  | 1   | 1  | MYH7       | 0.0 | 0.0   | 741.0  | 0.0 | 0.0 |
| ENSG00000160808 | 3  | myosin light chain 3                                      | 2   | 1  | 1     | 2225 | 11  | 1  | MYL3       | 0.0 | 0.0   | 695.3  | 0.0 | 0.0 |
| ENSG00000205678 | 4  | trans-2,3-enoyl-CoA reductase like                        | 1   | 1  | 1     | 526  | 1   | 1  | TECRL      | 0.0 | 0.0   | 526.0  | 0.0 | 0.0 |
| ENSG00000118194 | 1  | troponin T2, cardiac type                                 | 11  | 8  | 5     | 2476 | 2   | 1  | TNNT2      | 0.0 | 0.0   | 458.5  | 0.0 | 0.0 |
| ENSG00000140795 | 16 | myosin light chain kinase 3                               | 4   | 2  | 1     | 663  | 2   | 1  | MYLK3      | 0.0 | 0.0   | 331.5  | 0.0 | 0.0 |
| ENSG00000134571 | 11 | myosin binding protein C3                                 | 1   | 1  | 1     | 281  | 1   | 1  | MYBPC3     | 0.0 | 0.0   | 281.0  | 0.0 | 0.0 |
| ENSG00000198125 | 22 | myoglobin                                                 | 1   | 2  | 1     | 497  | 1   | 4  | MB         | 0.0 | 0.0   | 276.1  | 0.0 | 0.0 |
| ENSG00000173641 | 1  | heat shock protein family B (small) member 7              | 1   | 4  | 1     | 424  | 1   | 1  | HSPB7      | 0.0 | 0.0   | 265.0  | 0.0 | 0.0 |
| ENSG00000141161 | 17 | unc-45 myosin chaperone B                                 | 1   | 1  | 1     | 362  | 1   | 3  | UNC45B     | 0.0 | 0.0   | 258.6  | 0.0 | 0.0 |

|                 |    |                                                             |    |    |    |      |      |    |         |     |     |       |        |     |
|-----------------|----|-------------------------------------------------------------|----|----|----|------|------|----|---------|-----|-----|-------|--------|-----|
| ENSG00000122367 | 10 | LIM domain binding 3                                        | 1  | 1  | 1  | 256  | 1    | 1  | LDB3    | 0.0 | 0.0 | 256.0 | 0.0    | 0.0 |
| ENSG00000139914 | 14 | fat storage inducing transmembrane protein 1                | 1  | 4  | 2  | 443  | 1    | 3  | FITM1   | 0.0 | 0.0 | 201.4 | 0.0    | 0.0 |
| ENSG00000250007 | 15 | 0                                                           | 11 | 9  | 3  | 1116 | 4    | 1  | GJD2-DT | 0.0 | 0.0 | 199.3 | 0.0    | 0.0 |
| ENSG00000159251 | 15 | actin alpha cardiac muscle 1                                | 13 | 9  | 2  | 1186 | 5    | 1  | ACTC1   | 0.0 | 0.0 | 197.7 | 0.0    | 0.0 |
| ENSG00000115593 | 2  | SET and MYND domain containing 1                            | 1  | 1  | 1  | 177  | 1    | 1  | SMYD1   | 0.0 | 0.0 | 177.0 | 0.0    | 0.0 |
| ENSG00000129170 | 11 | cysteine and glycine rich protein 3                         | 1  | 1  | 1  | 176  | 1    | 1  | CSRP3   | 0.0 | 0.0 | 176.0 | 0.0    | 0.0 |
| ENSG00000113430 | 5  | iroquois homeobox 4                                         | 1  | 1  | 1  | 151  | 1    | 1  | IRX4    | 0.0 | 0.0 | 151.0 | 0.0    | 0.0 |
| ENSG00000183072 | 5  | NK2 homeobox 5                                              | 1  | 1  | 1  | 143  | 1    | 1  | NKX2-5  | 0.0 | 0.0 | 143.0 | 0.0    | 0.0 |
| ENSG00000078114 | 10 | nebullette                                                  | 31 | 5  | 1  | 1231 | 11   | 1  | NEBL    | 0.0 | 0.0 | 125.6 | 0.0    | 0.0 |
| ENSG00000104879 | 19 | creatine kinase, M-type                                     | 1  | 1  | 1  | 143  | 1    | 2  | CKM     | 0.0 | 0.0 | 119.2 | 0.0    | 0.1 |
| ENSG00000130528 | 19 | histidine rich calcium binding protein                      | 1  | 1  | 1  | 112  | 1    | 1  | HRC     | 0.0 | 0.0 | 112.0 | 0.0    | 0.0 |
| ENSG00000141052 | 17 | myocardin                                                   | 4  | 7  | 1  | 311  | 1    | 1  | MYOCD   | 0.1 | 0.0 | 111.1 | 0.0    | 0.0 |
| ENSG00000091482 | X  | small muscle protein X-linked                               | 1  | 5  | 1  | 197  | 1    | 1  | SMPX    | 0.1 | 0.0 | 109.4 | 0.0    | 0.0 |
| ENSG00000143171 | 1  | retinoid X receptor gamma                                   | 1  | 3  | 1  | 153  | 1    | 1  | RXRG    | 0.1 | 0.0 | 109.3 | 0.0    | 0.0 |
| ENSG00000077522 | 1  | actinin alpha 2                                             | 3  | 1  | 1  | 147  | 1    | 1  | ACTN2   | 0.0 | 0.0 | 105.0 | 0.0    | 0.0 |
| ENSG00000172399 | 4  | myozenin 2                                                  | 1  | 1  | 1  | 98   | 1    | 1  | MYOZ2   | 0.0 | 0.0 | 98.0  | 0.0    | 0.0 |
| ENSG00000114854 | 3  | troponin C1, slow skeletal and cardiac type                 | 6  | 81 | 2  | 1792 | 8    | 1  | TNNC1   | 0.2 | 0.0 | 91.4  | 0.0    | 0.0 |
| ENSG00000169436 | 8  | collagen type XXII alpha 1 chain                            | 11 | 16 | 3  | 864  | 19   | 1  | COL22A1 | 0.1 | 0.0 | 86.4  | 0.1    | 0.0 |
| ENSG00000101605 | 18 | myomesin 1                                                  | 1  | 1  | 8  | 444  | 1    | 15 | MYOM1   | 0.0 | 0.1 | 85.4  | 0.0    | 0.2 |
| ENSG00000156885 | 16 | cytochrome c oxidase subunit 6A2                            | 1  | 1  | 1  | 164  | 1    | 6  | COX6A2  | 0.0 | 0.0 | 82.0  | 0.0    | 0.2 |
| ENSG00000147573 | 8  | tripartite motif containing 55                              | 1  | 1  | 1  | 81   | 1    | 1  | TRIM55  | 0.1 | 0.1 | 81.0  | 0.1    | 0.1 |
| ENSG00000185739 | 16 | sarcalumenin                                                | 1  | 1  | 1  | 111  | 3    | 1  | SRL     | 0.0 | 0.0 | 79.3  | 0.1    | 0.0 |
| ENSG00000170893 | 3  | thyrotropin releasing hormone                               | 1  | 6  | 1  | 281  | 9    | 1  | TRH     | 0.1 | 0.0 | 78.1  | 0.2    | 0.0 |
| ENSG00000120457 | 11 | potassium inwardly rectifying channel subfamily J member 5  | 1  | 2  | 1  | 92   | 1    | 1  | KCNJ5   | 0.1 | 0.1 | 76.7  | 0.1    | 0.1 |
| ENSG00000136574 | 8  | GATA binding protein 4                                      | 1  | 1  | 1  | 75   | 1    | 1  | GATA4   | 0.1 | 0.1 | 75.0  | 0.1    | 0.1 |
| ENSG00000112175 | 6  | bone morphogenetic protein 5                                | 1  | 1  | 1  | 256  | 14   | 1  | BMP5    | 0.0 | 0.0 | 71.1  | 0.3    | 0.0 |
| ENSG00000166090 | 14 | interleukin 25                                              | 1  | 1  | 1  | 71   | 1    | 1  | IL25    | 0.1 | 0.1 | 71.0  | 0.1    | 0.1 |
| ENSG00000143839 | 1  | renin                                                       | 1  | 1  | 1  | 1    | 1649 | 1  | REN     | 0.0 | 0.0 | 0.0   | 1649.0 | 0.0 |
| ENSG00000187513 | 1  | gap junction protein alpha 4                                | 1  | 1  | 1  | 3    | 517  | 1  | GJA4    | 0.0 | 0.0 | 0.0   | 369.3  | 0.0 |
| ENSG00000130300 | 19 | plasmalemma vesicle associated protein                      | 1  | 1  | 1  | 2    | 342  | 1  | PLVAP   | 0.0 | 0.0 | 0.0   | 285.0  | 0.0 |
| ENSG00000128917 | 15 | delta like canonical Notch ligand 4                         | 1  | 1  | 1  | 2    | 311  | 1  | DLL4    | 0.0 | 0.0 | 0.0   | 259.2  | 0.0 |
| ENSG00000149564 | 11 | endothelial cell adhesion molecule                          | 1  | 1  | 1  | 4    | 412  | 1  | ESAM    | 0.0 | 0.0 | 0.0   | 257.5  | 0.0 |
| ENSG00000161940 | 17 | BCL6B transcription repressor                               | 3  | 1  | 1  | 6    | 585  | 2  | BCL6B   | 0.0 | 0.0 | 0.1   | 225.0  | 0.0 |
| ENSG00000102924 | 16 | cerebellin 1 precursor                                      | 3  | 1  | 1  | 1    | 287  | 1  | CBLN1   | 0.0 | 0.0 | 0.0   | 205.0  | 0.0 |
| ENSG00000100985 | 20 | matrix metallopeptidase 9                                   | 3  | 1  | 1  | 1    | 272  | 1  | MMP9    | 0.0 | 0.0 | 0.0   | 194.3  | 0.0 |
| ENSG00000164326 | 5  | CART prepropeptide                                          | 1  | 1  | 1  | 1    | 169  | 1  | CARTPT  | 0.0 | 0.0 | 0.0   | 169.0  | 0.0 |
| ENSG00000204103 | 20 | MAF bZIP transcription factor B                             | 1  | 2  | 1  | 1    | 168  | 1  | MAFB    | 0.1 | 0.0 | 0.0   | 140.0  | 0.0 |
| ENSG00000185559 | 14 | delta like non-canonical Notch ligand 1                     | 3  | 4  | 1  | 1    | 277  | 1  | DLK1    | 0.1 | 0.0 | 0.0   | 138.5  | 0.0 |
| ENSG00000152910 | 16 | contactin associated protein family member 4                | 1  | 1  | 1  | 1    | 121  | 1  | CNTNAP4 | 0.0 | 0.0 | 0.0   | 121.0  | 0.0 |
| ENSG00000280623 | 22 | endogenous retrovirus group K member 5 Gag polyprotein-like | 1  | 1  | 1  | 1    | 118  | 1  | PCAT14  | 0.0 | 0.0 | 0.0   | 118.0  | 0.0 |
| ENSG00000174059 | 1  | CD34 molecule                                               | 1  | 1  | 1  | 3    | 155  | 1  | CD34    | 0.0 | 0.0 | 0.1   | 110.7  | 0.0 |
| ENSG00000169291 | 1  | Src homology 2 domain containing E                          | 1  | 1  | 1  | 1    | 123  | 2  | SHE     | 0.0 | 0.0 | 0.0   | 102.5  | 0.1 |
| ENSG00000167244 | 11 | insulin like growth factor 2                                | 1  | 11 | 22 | 41   | 1594 | 4  | IGF2    | 0.0 | 0.1 | 0.1   | 100.9  | 0.0 |
| ENSG00000010319 | 3  | semaphorin 3G                                               | 5  | 1  | 1  | 1    | 172  | 1  | SEMA3G  | 0.0 | 0.0 | 0.0   | 95.6   | 0.0 |
| ENSG00000179776 | 16 | cadherin 5                                                  | 1  | 1  | 1  | 4    | 149  | 1  | CDH5    | 0.0 | 0.0 | 0.1   | 93.1   | 0.0 |
| ENSG00000178726 | 20 | thrombomodulin                                              | 1  | 1  | 1  | 3    | 141  | 2  | THBD    | 0.0 | 0.0 | 0.1   | 88.1   | 0.1 |
| ENSG00000175874 | 2  | cellular repressor of E1A stimulated genes 2                | 1  | 1  | 1  | 1    | 88   | 1  | CREG2   | 0.1 | 0.1 | 0.1   | 88.0   | 0.1 |
| ENSG00000157554 | 21 | ETS transcription factor ERG                                | 2  | 1  | 1  | 5    | 173  | 1  | ERG     | 0.0 | 0.0 | 0.1   | 86.5   | 0.0 |
| ENSG00000139567 | 12 | activin A receptor like type 1                              | 1  | 1  | 4  | 1    | 134  | 1  | ACVRL1  | 0.0 | 0.1 | 0.0   | 83.8   | 0.0 |
| ENSG00000036565 | 8  | solute carrier family 18 member A1                          | 1  | 1  | 1  | 1    | 77   | 1  | SLC18A1 | 0.1 | 0.1 | 0.1   | 77.0   | 0.1 |
| ENSG00000136630 | 1  | H2.0 like homeobox                                          | 1  | 1  | 7  | 1    | 158  | 1  | HLX     | 0.0 | 0.2 | 0.0   | 71.8   | 0.0 |

|                 |    |                                                                |   |   |    |    |     |      |          |     |     |     |      |        |
|-----------------|----|----------------------------------------------------------------|---|---|----|----|-----|------|----------|-----|-----|-----|------|--------|
| ENSG00000125810 | 20 | CD93 molecule                                                  | 1 | 1 | 1  | 2  | 256 | 13   | CD93     | 0.0 | 0.0 | 0.0 | 71.1 | 0.2    |
| ENSG00000155792 | 8  | DEP domain containing MTOR interacting protein                 | 6 | 1 | 4  | 4  | 241 | 2    | DEPTOR   | 0.0 | 0.1 | 0.1 | 70.9 | 0.0    |
| ENSG00000113389 | 5  | natriuretic peptide receptor 3                                 | 1 | 1 | 2  | 1  | 83  | 1    | NPR3     | 0.1 | 0.1 | 0.1 | 69.2 | 0.1    |
| ENSG00000164683 | 8  | hes related family bHLH transcription factor with YRPW motif 1 | 1 | 1 | 1  | 12 | 219 | 1    | HEY1     | 0.0 | 0.0 | 0.3 | 68.4 | 0.0    |
| ENSG00000164736 | 8  | SRY-box transcription factor 17                                | 1 | 1 | 1  | 1  | 67  | 1    | SOX17    | 0.1 | 0.1 | 0.1 | 67.0 | 0.1    |
| ENSG00000170689 | 17 | homeobox B9                                                    | 1 | 1 | 27 | 1  | 411 | 1    | HOXB9    | 0.0 | 0.3 | 0.0 | 66.3 | 0.0    |
| ENSG00000129965 | 11 | INS-IGF2 readthrough                                           | 1 | 1 | 7  | 9  | 243 | 1    | INS-IGF2 | 0.0 | 0.1 | 0.2 | 63.9 | 0.0    |
| ENSG00000037280 | 5  | fms related receptor tyrosine kinase 4                         | 4 | 1 | 1  | 2  | 113 | 1    | FLT4     | 0.0 | 0.0 | 0.1 | 62.8 | 0.0    |
| ENSG00000147113 | X  | divergent protein kinase domain 2B                             | 1 | 1 | 1  | 1  | 62  | 1    | DIPK2B   | 0.1 | 0.1 | 0.1 | 62.0 | 0.1    |
| ENSG00000142748 | 1  | ficolin 3                                                      | 1 | 1 | 1  | 4  | 96  | 1    | FCN3     | 0.0 | 0.0 | 0.2 | 60.0 | 0.0    |
| ENSG00000171056 | 8  | SRY-box transcription factor 7                                 | 3 | 1 | 1  | 16 | 253 | 1    | SOX7     | 0.0 | 0.0 | 0.3 | 57.5 | 0.0    |
| ENSG00000134830 | 19 | complement C5a receptor 2                                      | 2 | 1 | 1  | 1  | 66  | 1    | C5AR2    | 0.1 | 0.1 | 0.1 | 55.0 | 0.1    |
| ENSG00000173269 | 10 | multimerin 2                                                   | 2 | 1 | 1  | 3  | 85  | 1    | MMRN2    | 0.1 | 0.1 | 0.2 | 53.1 | 0.1    |
| ENSG00000120279 | 6  | MYC target 1                                                   | 1 | 1 | 2  | 1  | 63  | 1    | MYCT1    | 0.1 | 0.1 | 0.1 | 52.5 | 0.1    |
| ENSG00000257551 | 1  | HLX antisense RNA 1                                            | 1 | 1 | 2  | 1  | 63  | 1    | HLX-AS1  | 0.1 | 0.1 | 0.1 | 52.5 | 0.1    |
| ENSG00000141314 | 17 | rhomboid like 3                                                | 1 | 1 | 1  | 1  | 52  | 1    | RHBDL3   | 0.1 | 0.1 | 0.1 | 52.0 | 0.1    |
| ENSG00000115523 | 2  | granulysin                                                     | 3 | 2 | 2  | 1  | 1   | 7662 | GNLY     | 0.0 | 0.0 | 0.0 | 0.0  | 4256.7 |
| ENSG00000105374 | 19 | natural killer cell granule protein 7                          | 1 | 3 | 1  | 1  | 1   | 4911 | NKG7     | 0.0 | 0.0 | 0.0 | 0.0  | 3507.9 |
| ENSG00000271503 | 17 | C-C motif chemokine ligand 5                                   | 1 | 1 | 1  | 1  | 1   | 2625 | CCL5     | 0.0 | 0.0 | 0.0 | 0.0  | 2625.0 |
| ENSG00000111796 | 12 | killer cell lectin like receptor B1                            | 1 | 1 | 1  | 2  | 1   | 2186 | KLRB1    | 0.0 | 0.0 | 0.0 | 0.0  | 1821.7 |
| ENSG00000011600 | 19 | transmembrane immune signaling adaptor TYROBP                  | 1 | 1 | 1  | 1  | 1   | 1157 | TYROBP   | 0.0 | 0.0 | 0.0 | 0.0  | 1157.0 |
| ENSG00000145649 | 5  | granzyme A                                                     | 1 | 1 | 2  | 1  | 2   | 1377 | GZMA     | 0.0 | 0.0 | 0.0 | 0.0  | 983.6  |
| ENSG00000140678 | 16 | integrin subunit alpha X                                       | 1 | 1 | 1  | 1  | 1   | 918  | ITGAX    | 0.0 | 0.0 | 0.0 | 0.0  | 918.0  |
| ENSG00000277089 | 17 | 0                                                              | 1 | 1 | 1  | 1  | 1   | 914  | CCL3-AS1 | 0.0 | 0.0 | 0.0 | 0.0  | 914.0  |
| ENSG00000277632 | 17 | C-C motif chemokine ligand 3                                   | 1 | 1 | 1  | 1  | 1   | 911  | CCL3     | 0.0 | 0.0 | 0.0 | 0.0  | 911.0  |
| ENSG00000167286 | 11 | CD3 delta subunit of T-cell receptor complex                   | 1 | 1 | 1  | 1  | 2   | 897  | CD3D     | 0.0 | 0.0 | 0.0 | 0.0  | 747.5  |
| ENSG00000180644 | 10 | perforin 1                                                     | 1 | 1 | 1  | 1  | 2   | 816  | PRF1     | 0.0 | 0.0 | 0.0 | 0.0  | 680.0  |
| ENSG00000227507 | 6  | lymphotoxin beta                                               | 1 | 6 | 1  | 1  | 4   | 1738 | LTB      | 0.0 | 0.0 | 0.0 | 0.0  | 668.5  |
| ENSG00000172543 | 11 | cathepsin W                                                    | 2 | 3 | 5  | 7  | 4   | 2713 | CTSW     | 0.0 | 0.0 | 0.0 | 0.0  | 646.0  |
| ENSG00000139626 | 12 | integrin subunit beta 7                                        | 4 | 2 | 3  | 1  | 2   | 1498 | ITGB7    | 0.0 | 0.0 | 0.0 | 0.0  | 624.2  |
| ENSG00000204475 | 6  | natural cytotoxicity triggering receptor 3                     | 1 | 1 | 1  | 1  | 5   | 978  | NCR3     | 0.0 | 0.0 | 0.0 | 0.0  | 543.3  |
| ENSG00000147168 | X  | interleukin 2 receptor subunit gamma                           | 1 | 1 | 1  | 1  | 1   | 519  | IL2RG    | 0.0 | 0.0 | 0.0 | 0.0  | 519.0  |
| ENSG00000110934 | 12 | bridging integrator 2                                          | 1 | 1 | 1  | 1  | 1   | 494  | BIN2     | 0.0 | 0.0 | 0.0 | 0.0  | 494.0  |
| ENSG00000205810 | 12 | killer cell lectin like receptor C3                            | 1 | 1 | 1  | 1  | 1   | 486  | KLRC3    | 0.0 | 0.0 | 0.0 | 0.0  | 486.0  |
| ENSG00000128340 | 22 | Rac family small GTPase 2                                      | 1 | 1 | 1  | 2  | 4   | 837  | RAC2     | 0.0 | 0.0 | 0.0 | 0.0  | 465.0  |
| ENSG00000000938 | 1  | FGR proto-oncogene, Src family tyrosine kinase                 | 1 | 1 | 1  | 1  | 1   | 439  | FGR      | 0.0 | 0.0 | 0.0 | 0.0  | 439.0  |
| ENSG00000020633 | 1  | RUNX family transcription factor 3                             | 1 | 1 | 1  | 1  | 1   | 416  | RUNX3    | 0.0 | 0.0 | 0.0 | 0.0  | 416.0  |
| ENSG00000198851 | 11 | CD3 epsilon subunit of T-cell receptor complex                 | 1 | 1 | 1  | 1  | 1   | 399  | CD3E     | 0.0 | 0.0 | 0.0 | 0.0  | 399.0  |
| ENSG00000158869 | 1  | Fc epsilon receptor Ig                                         | 2 | 2 | 2  | 1  | 3   | 788  | FCER1G   | 0.0 | 0.0 | 0.0 | 0.0  | 394.0  |
| ENSG00000204482 | 6  | leukocyte specific transcript 1                                | 1 | 1 | 1  | 1  | 8   | 937  | LST1     | 0.0 | 0.0 | 0.0 | 0.0  | 390.4  |
| ENSG00000132965 | 13 | arachidonate 5-lipoxygenase activating protein                 | 1 | 2 | 5  | 1  | 1   | 771  | ALOX5AP  | 0.0 | 0.0 | 0.0 | 0.0  | 385.5  |
| ENSG00000100385 | 22 | interleukin 2 receptor subunit beta                            | 2 | 1 | 1  | 1  | 6   | 815  | IL2RB    | 0.0 | 0.0 | 0.0 | 0.0  | 370.5  |
| ENSG00000143851 | 1  | protein tyrosine phosphatase non-receptor type 7               | 1 | 1 | 1  | 1  | 5   | 657  | PTPN7    | 0.0 | 0.0 | 0.0 | 0.0  | 365.0  |
| ENSG00000186517 | 1  | Rho GTPase activating protein 30                               | 1 | 1 | 1  | 1  | 1   | 355  | ARHGAP30 | 0.0 | 0.0 | 0.0 | 0.0  | 355.0  |
| ENSG00000172236 | 16 | tryptase alpha/beta 1                                          | 1 | 1 | 1  | 1  | 1   | 327  | TPSAB1   | 0.0 | 0.0 | 0.0 | 0.0  | 327.0  |
| ENSG00000117091 | 1  | CD48 molecule                                                  | 1 | 1 | 1  | 1  | 1   | 326  | CD48     | 0.0 | 0.0 | 0.0 | 0.0  | 326.0  |
| ENSG00000100453 | 14 | granzyme B                                                     | 1 | 1 | 1  | 1  | 1   | 311  | GZMB     | 0.0 | 0.0 | 0.0 | 0.0  | 311.0  |
| ENSG00000197253 | 16 | tryptase beta 2                                                | 1 | 1 | 1  | 1  | 1   | 311  | TPSB2    | 0.0 | 0.0 | 0.0 | 0.0  | 311.0  |
| ENSG00000105492 | 19 | sialic acid binding Ig like lectin 6                           | 1 | 1 | 1  | 1  | 1   | 287  | SIGLEC6  | 0.0 | 0.0 | 0.0 | 0.0  | 287.0  |
| ENSG00000205045 | 17 | schlafen family member 12 like                                 | 1 | 1 | 1  | 1  | 1   | 285  | SLFN12L  | 0.0 | 0.0 | 0.0 | 0.0  | 285.0  |
| ENSG00000126264 | 19 | hematopoietic cell signal transducer                           | 1 | 1 | 2  | 5  | 2   | 618  | HCST     | 0.0 | 0.0 | 0.0 | 0.0  | 280.9  |

|                 |   |                              |   |   |   |   |   |     |           |     |     |     |     |       |
|-----------------|---|------------------------------|---|---|---|---|---|-----|-----------|-----|-----|-----|-----|-------|
| ENSG0000004468  | 4 | CD38 molecule                | 1 | 1 | 1 | 1 | 1 | 279 | CD38      | 0.0 | 0.0 | 0.0 | 0.0 | 279.0 |
| ENSG00000147443 | 8 | docking protein 2            | 1 | 1 | 1 | 1 | 1 | 266 | DOK2      | 0.0 | 0.0 | 0.0 | 0.0 | 266.0 |
| ENSG00000235576 | 2 | 0                            | 1 | 1 | 3 | 1 | 1 | 362 | LINC01871 | 0.0 | 0.0 | 0.0 | 0.0 | 258.6 |
| ENSG00000082074 | 5 | FYN binding protein 1        | 1 | 1 | 1 | 1 | 1 | 258 | FYB1      | 0.0 | 0.0 | 0.0 | 0.0 | 258.0 |
| ENSG00000179144 | 7 | GTPase, IMAP family member 7 | 1 | 1 | 1 | 1 | 1 | 258 | GIMAP7    | 0.0 | 0.0 | 0.0 | 0.0 | 258.0 |
