# Supplementary material for: GMP-compliant iPS cell lines show widespread plasticity in a new set of differentiation workflows for cell replacement and cancer immunotherapy
Source: PubMed Central journal article supplement (PMC11386223; doi:10.1093/stcltm/szae047), 2024-07-23
Supplement: szae047_suppl_supplementary_table_s3.pdf [file szae047_suppl_supplementary_table_s3.pdf]

## Antibodies

### Flow cytometry

| Name / antigen - conjugated Abs | Supplier        | Cat.no.     | Dilution | Control / remarks                 |
|---------------------------------|-----------------|-------------|----------|-----------------------------------|
| Cardiac troponin C (cTnC)       | Miltenyi Biotec | 130-119-575 | 1:50     | IgG1-FITC                         |
| 2B4                             | Miltenyi Biotec | 130-132-358 | 1:50     | IgG1-PE                           |
| CD117                           | Miltenyi Biotec | 130-116-609 | 1:200    | IgG1-PE                           |
| CD122                           | Miltenyi Biotec | 130-100-251 | 1:20     | IgG1-FITC                         |
| CD14                            | Miltenyi Biotec | 130-110-520 | 1:50     | IgG1-APC                          |
| CD144 (CDH5)                    | BD Biosciences  | 561714      | 1:20     | IgG1-PE                           |
| CD16                            | Miltenyi Biotec | 130-113-392 | 1:50     | IgG1-FITC                         |
| CD163                           | Miltenyi Biotec | 130-112-286 | 1:50     | IgG1-PE                           |
| CD166                           | Miltenyi Biotec | 130-125-116 | 1:50     | IgG1-FITC                         |
| CD28                            | BioLegend       | 302908      | 1:20     | IgG1-PE                           |
| CD31                            | BioLegend       | 303104      | 1:20     | IgG1-FITC                         |
| CD31 (PECAM-1)                  | BioLegend       | 303104      | 1:20     | IgG1-FITC                         |
| CD34                            | BD Pharming     | 555821      | 1:20     | IgG1-FITC                         |
| CD34                            | Miltenyi Biotec | 130-120-514 | 1:50     | IgG1-APC                          |
| CD34                            | BD Pharmingen   | 555821      | 1:20     | IgG1-FITC                         |
| CD38                            | Miltenyi Biotec | 130-126-887 | 1:50     | IgG1-VioBright B515               |
| CD3ε                            | BioLegend       | 317318      | 1:10     | IgG1-APC                          |
| CD4                             | BioLegend       | 317408      | 1:40     | IgG1-FITC                         |
| CD43                            | Miltenyi Biotec | 130-114-598 | 1:200    | IgG1-VioBlue                      |
| CD45                            | Miltenyi Biotec | 130-110-632 | 1:50     | IgG1-PE                           |
| CD47                            | Miltenyi Biotec | 130-123-691 | 1:20     | IgG1-FITC                         |
| CD5                             | Miltenyi Biotec | 130-110-990 | 1:200    | IgG1-PE                           |
| CD7                             | Miltenyi Biotec | 130-124-932 | 1:200    | IgG1-APC                          |
| CD86                            | Miltenyi Biotec | 130-116-264 | 1:50     | IgG1-APC                          |
| CD8a                            | BioLegend       | 300928      | 1:20     | PacificBlue-conjugated            |
| CD90                            | Miltenyi Biotec | 130-120-514 | 1:50     | IgG1-PE                           |
| HLA A/B/C (class I)             | Miltenyi Biotec | 130-120-432 | 1:50     | IgG1-FITC                         |
| HLA DR/DQ/DP (class II)         | Miltenyi Biotec | 130-123-695 | 1:50     | IgG1-FITC                         |
| KDR (FLK1)                      | Miltenyi Biotec | 130-120-620 | 1:50     | IgG1-PE                           |
| NKG2D                           | Miltenyi Biotec | 130-111-846 | 1:50     | IgG1-APC                          |
| NKp30                           | Miltenyi Biotec | 130-112-431 | 1:50     | IgG1-APC                          |
| NKp44                           | Miltenyi Biotec | 130-120-361 | 1:50     | IgG1-VioBright B515               |
| NKp46                           | Miltenyi Biotec | 130-112-121 | 1:50     | IgG1-PE                           |
| TCR αβ                          | Miltenyi Biotec | 130-113-536 | 1:200    | APC-Vio770-conjugated             |
| TCR γδ                          | BioLegend       | 331217      | 1:40     | BrilliantViolet 421-conjugated    |
| TRA-1-60                        | Miltenyi Biotec | 130-122-965 | 1:50     | IgG1-PE                           |
| IgG1-FITC                       | Miltenyi Biotec | 130-113-437 | 1:50     | Gating control for conjugated Abs |
| IgG1-PE                         | Miltenyi Biotec | 130-113-438 | 1:50     | Gating control for conjugated Abs |
| IgG1-APC                        | Miltenyi Biotec | 130-113-446 | 1:50     | Gating control for conjugated Abs |

|                                |                 |             |        |                                                    |
|--------------------------------|-----------------|-------------|--------|----------------------------------------------------|
| IgG1-VioBright B515            | Miltenyi Biotec | 130-113-457 | 1:50   | Gating control for conjugated Abs                  |
| IgG1-VioBlue                   | Miltenyi Biotec | 130-119-881 | 1:200  | Gating control for conjugated Abs                  |
| Goat $\alpha$ -mouse IgG 488   | Thermo          | A11001      | 1:1000 | Secondary Ab & gating control for unconjugated Abs |
| Rabbit $\alpha$ -mouse IgG 647 | Thermo          | A21239      | 1:1000 | Secondary Ab & gating control for unconjugated Abs |
| Goat $\alpha$ -rabbit IgG 647  | Thermo          | A21244      | 1:1000 | Secondary Ab & gating control for unconjugated Abs |

| <b>Name / antigen - unconjugated Abs</b> | <b>Supplier</b> | <b>Cat.no.</b> | <b>Dilution</b> | <b>Secondary Ab &amp; gating control / remarks</b> |
|------------------------------------------|-----------------|----------------|-----------------|----------------------------------------------------|
| BEST1                                    | Abcam           | ab2182         | 1:150           | Rabbit $\alpha$ -mouse IgG 647                     |
| CD105                                    | BioLegend       | 323202         | 1:25            | Rabbit $\alpha$ -mouse IgG 647                     |
| CD14                                     | Thermo          | MA119223       | 1:30            | Goat $\alpha$ -mouse IgG 488                       |
| CD44                                     | BD Biosciences  | 555476         | 1:30            | Goat $\alpha$ -mouse IgG 488                       |
| CD73                                     | BD Biosciences  | 750060         | 1:20            | Goat $\alpha$ -mouse IgG 488                       |
| CD90                                     | BioLegend       | 328102         | 1:100           | Goat $\alpha$ -mouse IgG 488                       |
| MITF                                     | Abcam           | ab12039        | 1:150           | Rabbit $\alpha$ -mouse IgG 647                     |
| PMEL17                                   | Abcam           | ab137078       | 1:50            | Goat $\alpha$ -rabbit IgG 647                      |
| ZO1                                      | Abcam           | ab216880       | 1:150           | Goat $\alpha$ -rabbit IgG 647                      |

## Immunocytochemistry

| <b>Primary Abs</b>           | <b>Supplier</b> | <b>Cat.no.</b> | <b>Dilution</b> | <b>Secondary Ab / remarks</b>   |
|------------------------------|-----------------|----------------|-----------------|---------------------------------|
| KDR (FLK1)                   | Cell Signaling  | 2479S          | 1:100           | Donkey $\alpha$ -rabbit IgG 488 |
| AFP                          | Sigma           | A8452          | 1:500           | Goat $\alpha$ -mouse IgG 488    |
| BEST1                        | Abcam           | ab2182         | 1:150           | Goat $\alpha$ -mouse IgG 488    |
| Cardiac troponin I (cTnI)    | Santa Cruz      | sc-15368       | 1:400           | Goat $\alpha$ -rabbit IgG 568   |
| CD31 (PECAM-1)               | Abcam           | ab9498         | 1:100           | Goat $\alpha$ -mouse IgG 488    |
| CD34                         | Abcam           | ab81289        | 1:100           | Donkey $\alpha$ -rabbit IgG 488 |
| CRALBP                       | Abcam           | ab15051        | 1:150           | Goat $\alpha$ -mouse IgG 488    |
| MITF                         | Abcam           | ab122982       | 1:150           | Goat $\alpha$ -rabbit IgG 568   |
| OCT4                         | Santa Cruz      | sc-5279        | 1:150           | Rabbit $\alpha$ -mouse IgG 568  |
| SMA                          | Agilent         | M085129-2      | 1:200           | Goat $\alpha$ -mouse IgG 488    |
| SOX2                         | R&D Systems     | AF2018         | 1:200           | Rabbit $\alpha$ -goat IgG 568   |
| ZO1                          | Abcam           | ab216880       | 1:150           | Goat $\alpha$ -rabbit IgG 568   |
| $\alpha$ -actinin (ACTN2)    | Sigma           | A7811          | 1:800           | Goat $\alpha$ -mouse IgG 488    |
| $\beta$ -III-tubulin (TUBB3) | Sigma           | T8660          | 1:1000          | Goat $\alpha$ -mouse IgG 488    |

| <b>Secondary Abs</b>            | <b>Supplier</b> | <b>Cat.no.</b> | <b>Dilution</b> | <b>Remarks</b> |
|---------------------------------|-----------------|----------------|-----------------|----------------|
| Donkey $\alpha$ -rabbit IgG 488 | Thermo          | A21206         | 1:1000          |                |
| Goat $\alpha$ -mouse IgG 488    | Thermo          | A11001         | 1:1000          |                |
| Goat $\alpha$ -rabbit IgG 568   | Thermo          | A11011         | 1:1000          |                |
| Rabbit $\alpha$ -goat IgG 568   | Thermo          | A11078         | 1:1000          |                |
| Rabbit $\alpha$ -mouse IgG 568  | Thermo          | A11061         | 1:1000          |                |
