# Supplementary material for: GMP-compliant iPS cell lines show widespread plasticity in a new set of differentiation workflows for cell replacement and cancer immunotherapy
Source: PubMed Central journal article supplement (PMC11386223; doi:10.1093/stcltm/szae047), 2024-07-23
Supplement: szae047_suppl_supplementary_table_s4.pdf [file szae047_suppl_supplementary_table_s4.pdf]

## DNA

### SYBR Green qPCR primers

| Name / amplicon    | Fwd primer sequence       | Rev primer sequence         | Produkt size [bp] | Remarks                                        |
|--------------------|---------------------------|-----------------------------|-------------------|------------------------------------------------|
| RPL37A             | GTGGTTCCATGCATGAAGACAGTG  | TTCTGATGGCGGACTTTACCG       | 84                | Housekeeping gene for normalization            |
| ACTA2 (SMA)        | TGTCCACCCGAAATGCTTCT      | AGCTTTGGCTAGGAATGATTTGGA    | 119               |                                                |
| ACTN2              | GCCAGAGAGAAGGATGCAATCAC   | AAGCATGGGAACCTGGAATCAA      | 75                |                                                |
| AFP                | AGCAGCTTGGTGGTGGATGA      | CCTGAGCTTGGCACAGATCCT       | 88                |                                                |
| ALB                | ACTTGTTGCTGCAAGTCAAGCTG   | CTTATTCTCATGGTAGGCTGAGATGCT | 77                |                                                |
| ATP1B1             | CTGCCCATCACTTTGGCTAGTG    | CAGCATGTGATGCCTCCAGAA       | 95                |                                                |
| BEST1              | CCACTGTATCAGAGGCCAGGCTA   | ACGGCGCTGATGGTTCTAGG        | 91                |                                                |
| CD34               | TCACCAGCTGCCTCTTCTGTG     | AACCAGGATCCCTGCTCAACC       | 84                |                                                |
| CD47 TG 1          | TAGGAAAAGCTGTAGAGGAACCC   | ATCAGTCAGTCAGTGCAGGAG       | 98                | Transgene-specific CD47, amplicon 1            |
| CD47 TG 2          | CTAGGAAAAGCTGTAGAGGAACCC  | GTCAGTGCAGGAGGAGACAAC       | 91                | Transgene-specific CD47, amplicon 2            |
| CLDN19             | CACAATGCCTAGGCTCCAACC     | TGACTTCTGATGCCAGGTCCA       | 70                |                                                |
| DCX                | AGGGCTTTCTTGGGTCAGAGG     | GCTGCGAATCTTCAGCACTCA       | 94                |                                                |
| DNMT3B             | GCTCACAGGGCCCGATACTT      | GCAGTCCTGCAGCTCGAGTTTA      | 93                |                                                |
| FGF2               | GGCAAGATGCAGGAGAGAGGA     | GCCACGTGAGAGCAGAGCAT        | 119               |                                                |
| gDNA control assay | CCCCTCTCAGGGAGATTTG       | CCCTGCCATTGGTTGGAGA         | 77                | Template control for vector elimination assays |
| miR-302/367 HT     | TGGAGGAGAACACGATCTTTGG    | GAACAGGGAAGAGGAAGAGAAGCA    | 83                |                                                |
| MITF               | GACTGTCTCTTGCGGATGCTTG    | AGAAATTATTGCTGCATCCAACAGC   | 74                |                                                |
| MYH6               | ACCTGGTGGACAAGCTGCAA      | CACCTTGCGGAACTTGGACA        | 101               |                                                |
| MYH7               | TTGATCTGCTCAGCCCTGGA      | GCTTCCTCCCAAGGAGCTGTT       | 74                |                                                |
| MYL2               | TGGTCCCTGCCCTCATCTCT      | GGCAGCCACATGGCTAACAG        | 73                |                                                |
| MYL4               | CTGGGCAAGAGGATGCCAAT      | GCACCTGGAAGACTCTGCTTCA      | 87                |                                                |
| MYL7 (MLC2a)       | CAGATGTTGCGCCCTGACACC     | TCGTCTCCATGGGTGATGATG       | 83                |                                                |
| NANOG              | AGGTCTCGTATTTGCTGCATCGT   | GAAACACTCGGTGAAATCAGGGTAA   | 119               |                                                |
| NEUROD1            | GACTGATTGCACCAGCCCTTC     | CGGACGGTTCGTGTTTGAAAG       | 89                |                                                |
| NKX2.5             | ACCAGTCCACCTCAACAGC       | CTCCGAGGAGTGAATGCAA         | 96                |                                                |
| NPNT               | TGGTAAAGGCAGGGCTGGAG      | ACAGCCATATATTCTGCCGTTACTCA  | 70                |                                                |
| OCT4 (POU5F1)      | GGAAGGAATTGGGAACACAAAGG   | AACTTCACCTTCCCTCCAACCA      | 71                |                                                |
| OTX2               | GCCAAATCCTTGGTTGAATCTTAGG | CAATCAGTCAACAAATTCACACAGC   | 120               |                                                |
| PMEL17             | AGGTGTTTCTGTCAACTCCAGGAAA | TTGTCCCATTTGGTGAAGACAGC     | 97                |                                                |
| RLPB1              | CATCTCCTGCCAGCTGAACTGT    | AGCAGCCCTTTCTAGCCTTG        | 82                |                                                |
| RPE65              | AGCCCGGGCAACTTCACTTA      | GTGGTGGTGAAGCCAGGAG         | 84                |                                                |
| SOX2               | TGGCGAACCATCTCTGTGGT      | CCACGGTGTCAACCTGCAT         | 111               |                                                |
| TNNT2 (CTNT)       | GGCAGCTCCTGTTTGGAAATG     | TTATTACTGGTGTGGAGTGGGTGTG   | 87                |                                                |
| TYR                | GAACACACCTGTCTTTGTCTTGCTG | CCTCATTACCAATAGCATCCTTTCC   | 98                |                                                |

### TaqMan qPCR primers

| Name / amplicon | Fwd primer sequence     | Rev primer sequence        | Produkt size | Remarks                                                                             |
|-----------------|-------------------------|----------------------------|--------------|-------------------------------------------------------------------------------------|
| Vector assay 1  | GAAGGACATATGGGAGGGCAAA  | TTGTTTCATGGCAGCCAGCAT      | 97           | Episomal vector elimination assay 1. Probe: TCAGATGAGTATTTGGTTTAGAGTTTGGCAAC        |
| Vector assay 2  | AGCGGATCTCAATTCCGATCATA | CTGGACGTAAACTCCTCTTCAGACCT | 100          | Episomal vector elimination assay 2. Probe: CAATAACCCTTAATATAAAGCTTTCGTATAATGTATGCT |

### Conventional PCR primers

| Name / amplicon    | Fwd primer sequence       | Rev primer sequence     | Produkt size         | Remarks                                                                            |
|--------------------|---------------------------|-------------------------|----------------------|------------------------------------------------------------------------------------|
| B2M span           | GCAGCGCAATCTCCAGTGAC      | CCTGCTCAACTGCAGGAAAC    | 797 (wt) / 207 (mut) | Spanning CRISPR-induced deletion in gDNA                                           |
| RFXANK span        | TGTGTGTGTGACCGTGTTCATGT   | CTCCAGCAGGAAGCGAACG     | 251 (wt) / 153 (mut) | Spanning CRISPR-induced deletion in gDNA                                           |
| AAVS1 span         | CTCCCTCCCAGGATCCTCTC      | CCCCGTTCTCCTGTGGATTC    | 507 (wt) / 3454 (KI) | Spanning cut site in AAVS1 locus (albeit not spanning KI homology arms)            |
| AAVS/CD47 upstream | TGAGTTTGCCAAGCAGTCAC      | GCGTTACTATGGGAACATACGTC | 969                  | Upstream detection of CD47 cassette integration in AAVS1 (spanning homology arm)   |
| AAVS/CD47 upstream | GACACTGTCGTCATTCCATGCTTTG | ACCCATGCAGTCTCCTTACC    | 2436                 | Downstream detection of CD47 cassette integration in AAVS1 (spanning homology arm) |

## Transgenes

### GFP knock-in sequence with homology arms of AAVS1 locus, CAG promoter, CD47 reading frame, and 3' UTR

CTCTCCTGGGCTTGCCAAGGACTCAAACCCAGAAGCCAGAGCAGGGCCCTTAGGGAAGCGGGACCTGCTCTGGGCGGAGGAATATGTCCCAGATAGCACTGGGGACTCTTTAAGGAAAGAAGGATGGAGAAAGAGAAAGGGAGTAGAGGGCCACGACCTGG  
TGAACACCTAGGACGCACCATTTCTCACAAGGGGAGTTTTCCACACGGGACACCCCCCTCCTACCACAGCCTGCCAGGACGGGGCTGGCTACTGGCCTTATCTCACAGGTAAAAC TGACGCACGGAGGAACAATATAAATTTGGGACTAGAAAGGTGAAGAGCC  
AAAGTTAGAAGCTCAGGACCAACTTATTCTGATTTGTTTTTCCAAACTGCTTCTCCTCTGGGAAAGTGTAAAGAACTGCAGCACCAGGATCAGTGAACGCACCAGACAGCCCGCTCAGAGCAGCTCAGGTTCCTGGAGAGGGTAGCGCAGGTTGCCACTGA  
GAACCGGGCAGGTACGCATCCCCCTTCCCTCCACCCCTGCCAAGCTCTCCCTCCAGGATCCTCTCTGGCTCCATCGTAAGCAAACCTTAGAGGTTCTGGCAACGTTACATAACTTACGGTAAATGGCCCGCTGGCTGACCGCCCAACGACCCCGCC  
CATTGACGTCAATAATGACGTATGTTCCCATAGTAACGCCAATAGGGACTTTCCATTGACGTCAATGGGTGGAGTATTTACGGTAAACTGCCCACTTGGCAGTACATCAAGTGTATCATATGCCAAGTACGCCCCCTATTGACGTCAATGACGGTAAATGGCC  
GCCGGCATTATGCCAGTACATGACCTTATGGGACTTTCCTACTTGGCAGTACATCTACGTATTAGTCATCGTATTACCATTGGTCGAGGTGAGCCCACTTCTGCTTCACTCTCCCATCTCCCCCTCCCCCAATTTGTATTATTTATTTT  
TTAATTATTTTGTGCAGCGATGGGGCGGGGGGGGGGGGGGGCGCGCCAGCGGGGGGGGGGGGGGGGCGAGGGGCGGGGGGGGGGGGGAGGGGCGGAGGTTGCGGGCGGAGGCTCGGGGGGAGCCCAATCAGAGGGCGGCTCCGAAAGTTTCCTTTTATGGCAGGGCGGCGGCG  
GGCGCCCTATAAAAAGCGAAGCGCGCGGGCGGGGAGTGCCTGCGACGCTGCCTTCGCCCGTGCCTCCCGCTCCGCGCCCGCTCGCGCCCGCCCGCCCGCTCTGACTGACCGGCTTACTCCACAGGTGAGCGGGCGGGACGCGCCCTTCCTCCGGGCT  
GTAATTAGCGCTTGGTTTAAATGACGGCTTGTTCCTTTCTGTGCTGCGTGAAAGCCTTGAGGGGCTCCGGGAGGGCCCTTGTGTGGGGGGAGCGGCTCGGGGGTGCCTGCTGTGTGTGTGCGTGGGGAGCGCGCTGCGGCTCCGCGCTGCCCGCGGC  
TGTGAGCGCTGCGGGCGCGGCGCGGGGCTTGTGCGCTCCGCACTGTCGCGAGGGGAGCGCGCCGGGGGCGGTGCCCGCGGTGCGGGGGGGGGTGCAGGGGAACAAGGCTGCGTGCGGGGTGTGTGCGTGGGGGGGTGAGCAGGGGGTGTGGGCGGTC  
GGTGGGCTGCAACCCCTTGCACCCCTCCCGAGTTGCTGAGCACGCGCCGCTTCGGGTGCGGGCTCCGTACGGGCGTGGCGGGGCTCGCCGTGCCGGGCGGGGGTGGCGGCAGGTGGGGTGCGGCGGGGCGGGGGCGCCTCGGGCCGGGG  
AGGGCTCGGGGAGGGGCGCGCGGGCCCGGAGCGCGCGGCTGTCGAGGCGCGCGAGCCGACGCCATTGCCTTTTATGGTAACTCGTGCGAGAGGGCGCAGGGACTTCTTTGTCCCAATCTGTGCGGAGCCGAAATCTGGGAGCGCGCGCCGACCC  
CTAGCGGGCGCGGGCGAAGCGGTGCGGGCGCGCAGGAAGAAATGGGCGGGGAGGGCTTCGTGCGTGC CGCGCGCGCTCCCTTCTCCCTTCCAGCCTCGGGGCTGTCCGCGGGGGACGGCTGCCTTCGGGGGGACGGGGCAGGGCGGGGTTCCG  
CTTCTGGCGTGTGACCGGGCTCTAGAGCTCTGCTAACCATGTTTCATGCCCTCTCTTTTTTCTTACAGCTCCTGGGCAACGTGCTGGTATTGTGCTGTCTCATCATTTTGGCAAAGAATTGATTTGATACCGGGGCCCTTCGCCACCATGGTCAGCAAGG  
GCGAGGAAGTTCACCGGGTGGTGCCATCCTGGTCGAGCTGGACGGCGACGTAACCGCCACAAGTTCAGCGTGTCCGGCGAGGGCGAGGGCGATGCCACCTACGGCAAGCTGACCTGAAGTTCATCTGTACCACCGCAAGCTGCCCGTGCCTTGCCC  
ACCTCGTGACACCTGACCTACGGGCTGCAATGCTTCAGCGCTACCCCGACCATGAAGCAGCAGCACTTCTCAAGTCCGCCATGCCCGAAGGCTACGTCAGGAGCGCACCATCTCTTCAAGGACGACGGCAACTACAAGACCCGCGCGAGGTGAA  
GTTTCGAGGGCGACACCTTGGTGAACCGCATCGAGCTGAAGGCATCGACTTCAAGGAGGACGGCAACATCCTGGGGCACAAGCTGGAGTACAAC TACAACAGCCACAACGCTTATATCATGGCCGACAAGCAGAAGAACGGCATCAAGGTGAAC TCAAGATCC  
GCCACAACATCGAGGACGGCAGCGTGAACCTCGCCGACCACTACCAGCAGAACACCCCATCGCGCAGGCCCCGTGCTGCTGCCGACAACCCTACCTGAGCACCAGTCCGCGCTGAGCAAAGACCCCAACGAGAAGCGCGATCACATGGTCTGCTGGAG  
TTCGTGACCGCGCGGGGATCACTCTCGGCATGGACGAGCTGTACAAGTAGAAGTGTCTCTCTGCCTGACTGACTGACTGATAACAATCGATTCTGGATCCGCGAGGCTCTGCTAGCTTGACTGACTGAGATACAGCGTACCTTCAGCTCACAGACATGATAAG  
ATACATTGATGAGTTTGGACAACCACAAC TAGAATGCAGTGAAAAAATGCTTTATTTGTGAAATTTGTGATGCTATTGCTTTATTTGTAACCATTATAAGCTGCAATAAACAAAGTTAACAAACAATTGCATTCATTTTATGTTTCAGGTTTCAGGGGAGG  
TGTGGGAGGTTTTTTGGAGAGAGATGGCTCCAGGAGGTGGGGTGTGTCACCAGATAAGGAATCTGCCTAACAGGAGGTGGGGT TAGACCCAATATCAGGAGACTAGGAAGGAGGAGCCCTAAGGATGGGGCTTTCTGTACCAATCCTGTCCCTAGTGCC  
CCACTGTGGGGTGGAGGGACAGATAAAAGTACCAGAACAGAGCCACATTAACCGCCCTGGGAATATAAGGTGGTCCCAGCTCGGGACACAGGATCCCTGGAGGACGAAACATGCTGTCTGAAGTGGACATAGGGGCCCGGTGGAGGAAGAAGACT  
AGCTGAGCTCTCGGACCCCTGGAAGATGCCATGACAGGGGGCTGGAAGAGCTAGCACAGACTAGAGAGGTAAGGGGGTAGGGGAGCTGCCCAATGAAAGAGTGAAGAGTGAAGGATCCACAGGAGAACGGGGTGTCCAGGCAAAGAAAGCAAGAGGATG  
GAGAGGTGGCTAAAGCCAGGAGACGGGTACTTTGGGGTGTCCAGAAAACGGTGATGATGCAGGCC TACAAGAAAGGGGAGCGGGACGCAAGGGAGACATCCGTCGGAGAAGGCCATCCT

**CD47 knock-in sequence with homology arms of AAVS1 locus, CAG promoter, CD47 reading frame, and 3' UTR**

CTCTCCTGGGCTTGCCAAGGACTCAAACCCAGAAGCCCAGAGCAGGGCCTTAGGGAAGCGGGACCTGTCTGGGCGGAGGAATATGTCCCAGATAGCACTGGGACTCTTTAAGGAAAAGAGATGGAGAAAAGAGAAAGGGAGTAGAGGCGGCCACGACCTGG  
TGAACACCTAGGACGCACCATTTCCACAAAGGGAGTTTCCACACGGACACCCCCCTCCTCACCACAGCCCTCCAGGACGCGGGCTGGCTACTGGCCCTTACTCACAGGTAAAACCTGACGCACGGAGGAACAATATAAATTGGGGACTAGAAAAGGTGAAGAGCC  
AAAGTTAGAAGCTCAGGACCAACTTATTCTGATTTTGTGTTCCTTCCAACTGCTTCTCCTCTTGGGAAGTGTAAAGGAAGCTGCAGCACCAGGATCAGTGAACGCACCAGACAGCCGCGTCAAGCAGCTCAGGTTCTGGGAGAGGGTAGCGCAGGGTGGCCACTGA  
GAACCGGGCAGGTACGCATCCCCCCTCCCTCCACCCCTGCCAAGCTCTCCCTCCAGGATCCTCTCTGGCTCCATCGTAAGCAAACCTTAGAGGTTCTGGCAACGTTACATAACTTACGGTAAATGGCCCGCTGGCTGACCGCCCAACGACCCCGCC  
CATTGACGTCAATAATGACGTATGTTCCCATAGTAACGCCAATAGGGACTTCCATTGACGTCAATGGTGGAGTATTTACGGTAAACTGCCCACTTGGCAGTACATCAAGTGTATCATATGCCAAGTACGCCCCCTATTGACGTCAATGACGGTAAATGGCCC  
GCCGGCATTATGCCCAGTACATGACCTTATGGGACTTTCCTACTTGGCAGTACATCTACGTATTAGTCATCGTATTACCATGGTTCGAGGTGAGCCCCACGTTCTGTCTCACTCTCCCCATCTCCCCCCTCCCCACCCCAATTTTGTATTTATTTATTTT  
TTAATTATTTTGTGCAGCGATGGGGGCGGGGGGGGGGGGGGGGGCGCGCCAGGCGGGGGGGGGGGGGGGGGCGAGGGGCGGAGGGTGGCGGGGCGCAATCAGAGCGGCGGCTCCGAAAGTTTCTTTTATGGCGAGGCGGGCGGGC  
GGCGCCCTATAAAAAGCGAAGCGCGCGGGGGGGGGAGTGCCTGCGACGCTGCCTTCGCCCCGTGCCCGCTCCGCCGCGGCTCGCGCCCGCCCGCCCGCTCTGACTGACCGCGTTACTCCACAGGTGAGCGGGCGGGACGGCCCTTCTCCTCCGGGCT  
GTAATTAGCGCTTGGTTAATGACGGCTTGTTCCTTTCTGTGGCTGGTGAAGCCCTTGGGGGCTCCGGGAGGGCCCTTTGTGGGGGGGAGCGGCTCGGGGGTGCCTGCCTGTGTGTGGTGGGGAGCGCCGCTGCGGCTCCGCGCTGCCCGCGGGC  
TGTGAGCGCTGCGGGCGCGGCGCGGGGCTTTGTGCCTCCGCAGTGTGCGCAGGGGAGCGCGCCGGGGGCGGTGCCCGCGGTGCGGGGGGGGCTGCGAGGGGAACAAGGCTGCGTGGGGGTGTGTGCTGGGGGGGTGAGCAGGGGGTGTGGCGCGTC  
GGTGGGGTGCACACCCCTGCACCCCTCCCGAGTTGCTGAGCAGGCCCGGCTTCCGGTGCAGGGCTCCGTACGGGGCTGGCGGGGCTCGCCGTGCCGGGCGGGGGTGGCGGCAGGTGGGGTGCAGGGGCGGGGGGGGGCCCTCGGGCGGGG  
AGGGCTCGGGGAGGGGGCGCGGCGCCCGGGAGCGCCGGCGGCTGTCGAGGCGGGCGAGCCGCGAGCCATTGCCTTTTATGGTAATCGTGCAGAGGGGCGAGGGACTTCCCTTTGTCCCAACTGTGTGCAGAGCCGAAATCTGGGAGGCGCCGCGACCCCTC  
TCTAGCGGGCGCGGGCGAAGCGGTGCGGCGCGGCAAGGAAAATGGGCGGGGAGGGCCCTTCGTGCGTGCAGCGCGCGCCCTCCCTTCCCTTCCAGCCTCGGGGCTGTCGCGGGGGGACGGCTGCCTTCGGGGGGACGGGGCAGGGCGGGGTTCCGG  
CTTCTGGCGTGTGACCGGGCTCTAGAGCCTCTGCTAACCATGTTTCATGCCCTTCTCTTTTCCCTACAGCTCCTGGGCAACGTGCTGGTTATTTGTCTGCTCTCATCATTTTGGCAAAGAATTGATTGATACCGGGCCCTTCGCCACCATGTGGCCCTGG  
TAGCGGCGCTGTGTGGGCTCGGCGTGTGCGGATCAGCTCAGCTACTATTTAATAAAAACAAATCTGTAGAATTACGTTTGTAAATGACACTGCTCATTCATGCTTGTACTAATATGGAGGCACAAACACTACTGAAGTATACGTAAAGTGGAAA  
TTTAAAGGAAGAGATATTACACCTTTGATGGAGCTCTAAACAAGTCCACTGTCCCACTGACTTTAGTAGTGCAAAAATGAAGTCTCACAATTAATAAAAGGAGATGCCTCTTTGAAGATGGATAAGAGTGTGTCTCACACACAGGAAACTACACTTG  
TGAAGTAACAGAATTAACCAGAGAAGGTGAACGATCATCGAGCTAAAAATCGTGTGTTTCATGTTTTCPCAAATGAAAAATTTCTTATTTTCCCAATTTTGTCTATACTCCTGTTCTGGGACAGTTTGGTATTAACACTTAAATATAGAT  
CCGGTGGTATGGATGAGAAAACAATTGCTTTACTTGTGTGCTGGACTAGTGATCACTGTCATTGTCATTGTTGGAGCCATTCTTTTCGTCCCAGGTGAATATTCATTAAGAAATGCTACTGGCCTTGGTTAATTGTGACTTCTACAGGATATTAATATTACTT  
CACTACTATGTGTTTAGTACAGCGATGGATTAACCTCCTTCGTCATTGCCATATGGTTATTCAGGTGATAGCCTATATCCTCGCTGTTGGTGGACTGAGTCTCTGATTGCGGCGGTATACCAATGCATGGCCCTCTTCTGATTTACGGTTTGGATATCTT  
AGCTCTAGCACAACTACTTGGACTAGTTTATATGAAATTTGTGGCTTCCAATCAGAAGACTATACAACCTCCTAGGAAAGCTGTAGAGGAACCCCTTAAATGCATTCAAAGAAATCAAAGGAATGATGAATGATGAATAAAAGTTGTCCTCCTGCACGACTGACTG  
ACTGATAACAATCGATTTCTGGATCCGCAGGCCCTCTGCTAGCTTACTGACTGAGTACAGCGTACCTTCAGCTCACAGACATGATAAGATACATTGATGAGTTTGGACAAACCAACTAGAAATGCAATGAAAAAATGCTTTATTTGTGAAATTTGTGATGCT  
ATTGCTTATTTGTAACCATTAAGCTGCAATAAACAAGTTAACAACAACAATTGCATTCATTTTATGTTTTCAGGTTTCAGGGGAGGTGTGGGAGGTTTTTGGAGAGAGATGGCTCCAGGAGGTGGGGGTGTGTCCACAGATAAGGAATCTGCCTAACAGGA  
GGTGGGGTTAGACCCAATATCAGGAGACTAGGAAGGAGGAGGCCAAAGGATGGGGCTTTTCTGTCAACCAATCCTGTCCCTAGTGGCCCACTGTGGGGTGGAGGGGACAGATAAAAGTACCCAGAACAGAGCCATTAACCGGCCCTGGGAATATAAGGTG  
GTCCCAGCTCGGGGACACAGGATCCCTGGAGGCAGCAACATGCTGTCCCTGAAGTGGACATAGGGGCCCGGGTTGGAGGAAGAAGACTAGCTGAGCTCTCGGACCCCTGGAAGATGCCATGACAGGGGGCTGGAAGAGCTAGCACAGACTAGAGAGGTAAGGGG  
GGTAGGGGAGCTGCCCAATGAAAGGAGTGAAGGTGACCCGAATCCACAGGAGAAACGGGTGTCCAGGCAAGAAAGCAAGAGGATGGAGAGGTGGCTAAAGCCAGGAGACGGGGTACTTTGGGTTGTCCAGAAAAACGGTGTATGTGACGGCCTACAAGA  
AGGGGAGGCGGGACGCAAGGGAGACATCCGTCGGAGAAGCCATCCT

## RNA

### gRNA sequences

| Name   | Sequence (excl. PAM)  | Sequence for second cut | Remarks |
|--------|-----------------------|-------------------------|---------|
| B2M    | GAUGACCAAUGUAAACACU   | GAAGUUGACUUACUGAAGAA    |         |
| RFXANK | GUCCCAUUUGGCAGCACUG   | GGUCUCAAUUCUCUCCAAAGG   |         |
| AAVS1  | CUGGAGCCAUCUCUCUCCUUG | n/a                     |         |
